# Supplementary material for: Thermally activated delayed fluorescence with a narrow emission spectrum and organic room temperature phosphorescence by controlling spin–orbit coupling and phosphorescence lifetime of metal-free organic molecules
Source: Royal Society of Chemistry journal article supplement (doi:10.1039/c8tc00175h), 2018-01-01
Supplement: c8tc00175h1.pdf [file c8tc00175h1.pdf]

## *Supporting information*

### ***Thermally Activated Delayed Fluorescence with Narrow Emission Spectrum and Organic Room Temperature Phosphorescence by Controlling Spin-Orbit Coupling and Phosphorescence Lifetime of Organic Molecules***

Piotr Pander, Agnieszka Swist, Radoslaw Motyka, Jadwiga Soloducho, Fernando B. Dias, Przemyslaw Data

| <b>Contents</b>                                                | <b>Page</b> |
|----------------------------------------------------------------|-------------|
| S1 – Synthesis                                                 | S2          |
| S2 – Supplementary photophysical data and experimental details | S2          |
| S3 – Device fabrication experimental details                   | S8          |
| S4 – References                                                | S9          |

## S1 - Synthesis

2,7-di(carbazol-9-yl)-N-hexylacridin-9-one (**1**) and 3,7-di(carbazol-9-yl)-N-butylphenothiazine (**2**) were synthesized according to the previously established procedure.<sup>1</sup>

3,5-di(9H-carbazol-9-yl)pyridine (**BCbmPy**) was prepared according to the literature.<sup>2</sup>

## S2 – Supplementary photophysical data and experimental details

**Photophysics.** Solutions ( $10^{-5}$  M) were degassed with 5 freeze-thaw cycles. Absorption and fluorescence spectra were collected using a UV-3600 double beam spectrophotometer (Shimadzu), and a Fluorolog fluorescence spectrometer (Jobin Yvon). Temperature-dependent and room temperature measurements were acquired using a continuous flow liquid nitrogen cryostat coupled with a vacuum pump. Phosphorescence (PH), prompt fluorescence (PF), and delayed fluorescence (DF) spectra and decays were recorded using nanosecond gated luminescence and lifetime measurements (from 400 ps to 1 s) with a high energy pulsed Nd:YAG laser emitting at 355 nm (EKSPLA) or N2 laser emitting at 337 nm (Lasertechnik Berlin). Emission was focused onto a spectrograph and detected on a sensitive gated iCCD camera (Stanford Computer Optics) having a sub-nanosecond resolution. PF/DF time-resolved measurements were performed by exponentially increasing gate and delay times. Photoluminescence quantum yields in solid state were determined using already described methods.<sup>3,4</sup> Photoluminescence quantum yield in solution was recorded against 9,10-diphenylanthracene as a standard, with  $\Phi_{\text{PL}} = 0.90$ .<sup>5</sup>

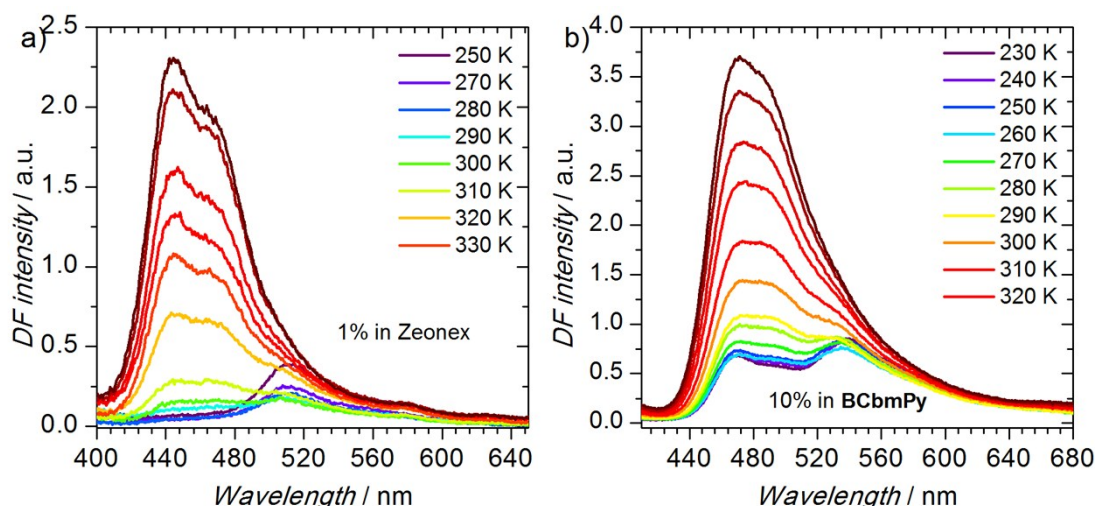

**Figure S1.** Integrated spectra of **1** doped films at 10 ms delay at various temperatures. a) 1% in zeonex; b) 10% in BCbmPy.

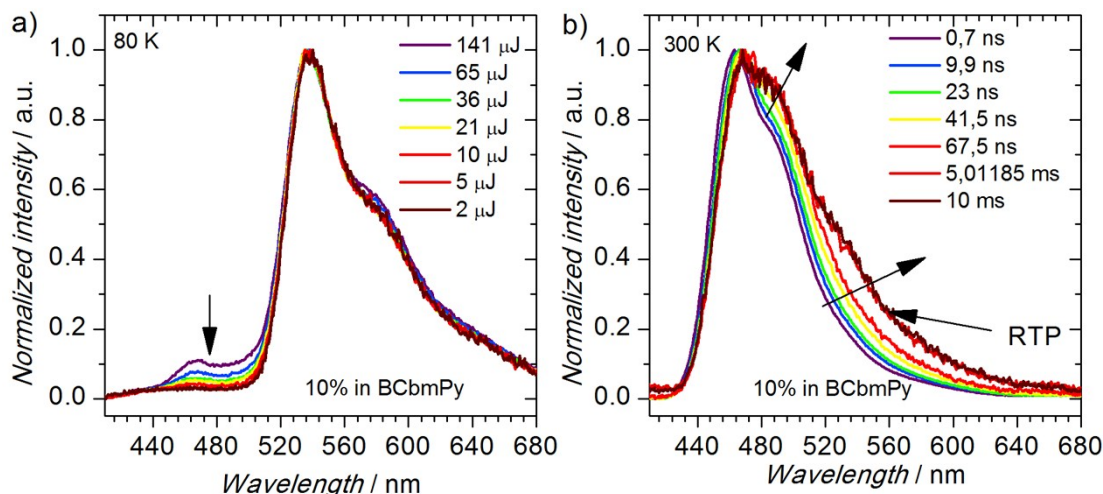

**Figure S2.** a) Phosphorescence spectra of **1** (delay 10 ms) at 80 K recorded using various laser pulse energy. The delayed fluorescence shows supralinear laser pulse dependence which indicates triplet-triplet annihilation; b) Time-resolved spectra of **1** recorded at 295 K. The emission spectrum gradually loses the vibronic structure with time delay. RTP – room temperature phosphorescence.

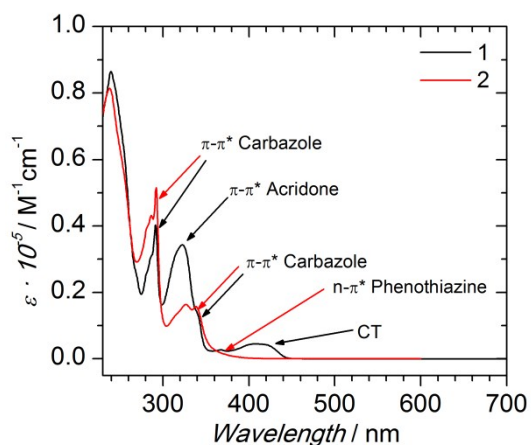

**Figure S3.** Absorption spectra of **1** and **2** in methycyclohexane (MCH).

**Table S1.** Absorption maxima and absorption coefficients for **1** and **2** in methycyclohexane (MCH).

| Compound | $\lambda_{\text{max}}$ , nm ( $\epsilon \cdot 10^{-5}$ , $\text{M}^{-1} \text{cm}^{-1}$ ) |
|----------|-------------------------------------------------------------------------------------------|
| <b>1</b> | 239 (0.87), 291 (0.40), 322 (0.34), 407 (0.05)                                            |
| <b>2</b> | 238 (0.81), 292 (0.52), 327 (0.16), 338 (0.16)                                            |

**Table S2.** Prompt, delayed fluorescence and phosphorescence lifetime in various solvents and matrices.

| Molecule | Environment | $\tau_{\text{PF}}$ , ns <sup>a</sup> | $\tau_{\text{DF}}$ , ms <sup>b</sup> | $\tau_{\text{PH}}$ , ms <sup>c</sup>                                   |
|----------|-------------|--------------------------------------|--------------------------------------|------------------------------------------------------------------------|
| <b>1</b> | Toluene     | $14 \pm 2$                           | -                                    | -                                                                      |
|          | Ethanol     | $18 \pm 2$                           | -                                    | -                                                                      |
|          | Zeonex, 1%  | $9.1 \pm 0.6$                        | $26.8 \pm 0.7$                       | $500 \pm 200$ (80 K)                                                   |
|          | BCbmPy, 10% | $9.3 \pm 0.4$                        | $10.2 \pm 0.5$                       | -                                                                      |
| <b>2</b> | Toluene     | $1.81 \pm 0.02$                      | -                                    | -                                                                      |
|          | Zeonex, 1%  | $1.96 \pm 0.02$                      | -                                    | $23 \pm 1$ (295 K)<br>$38 \pm 2$ (80 K)                                |
|          | BCbmPy, 10% | -                                    | -                                    | $2.2 \pm 0.2$ (58 %)<br>$19 \pm 2$ (42 %) (295 K)<br>$32 \pm 2$ (80 K) |

<sup>a</sup> prompt fluorescence lifetime at room temperature; <sup>b</sup> delayed fluorescence lifetime at room temperature; <sup>c</sup> phosphorescence lifetime.

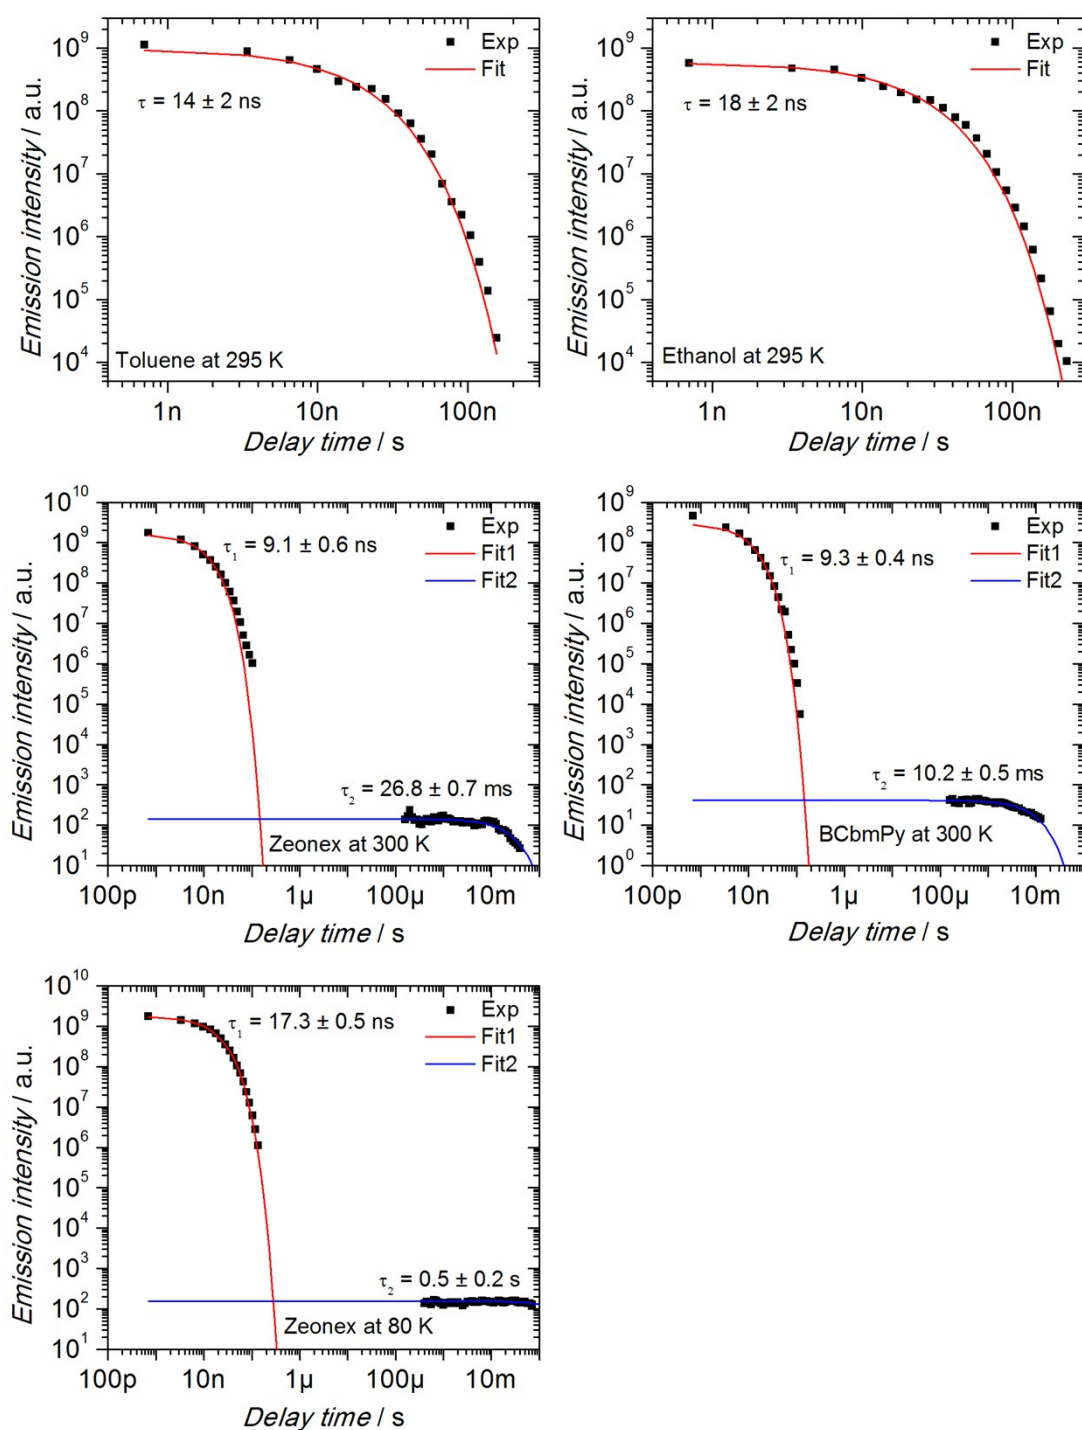

**Figure S4.** Prompt, delayed fluorescence and phosphorescence decay fits of **1** in various solvents and matrices.

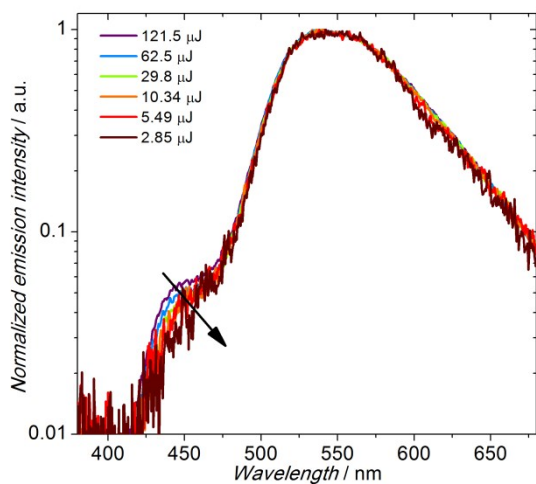

**Figure S5.** Phosphorescence spectra of **2** 10% in **BCbmPy** recorded at various laser pulse energy. A tail at *ca.* 450 nm decreases at small powers indicating supralinear power dependence, which suggests triplet-triplet annihilation.

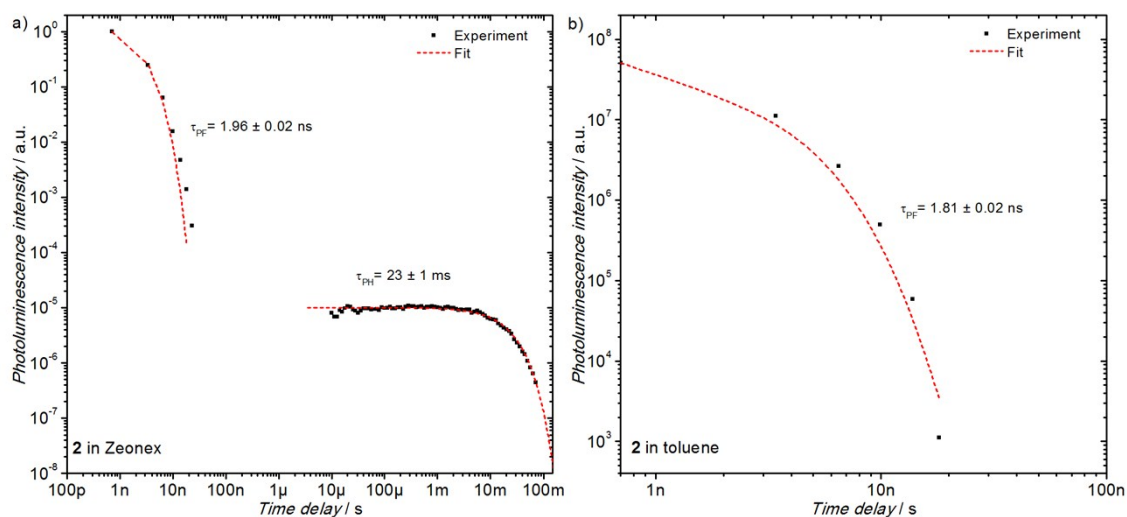

**Figure S6.** Room temperature decay of **2** in zeonex (a) and toluene (b) with fitting curves.

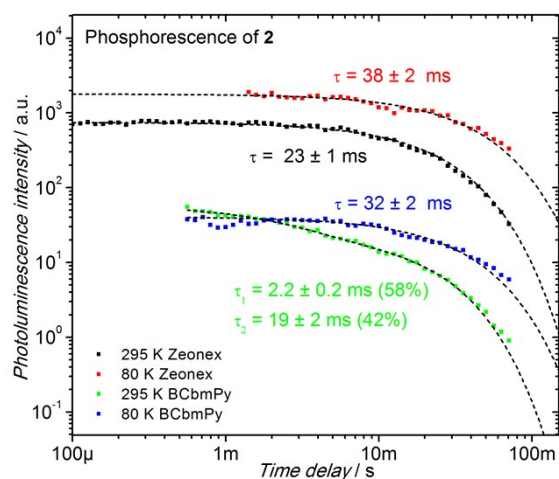

**Figure S7.** Room and low-temperature phosphorescence decay of **2** in zeonex and **BCbmPy** with fitting curves.

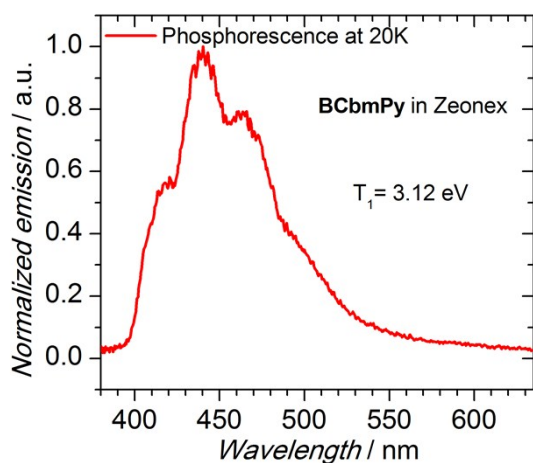

**Figure S8.** Fluorescence and phosphorescence spectra of **BCbmPy** 1% doped zeonex film (delay 10 ms).

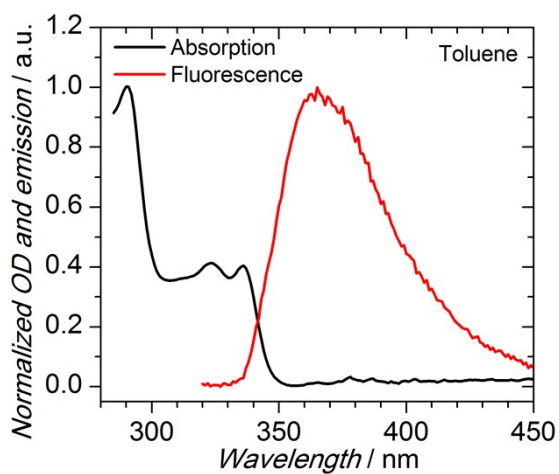

**Figure S9.** Absorption and emission spectra of **BCbmPy** in toluene.

### S3 – Device fabrication experimental details

All organic evaporated compounds were purified by Creaphys organic sublimation system, TAPC - 4,4'-Cyclohexylidenebis[*N,N*-bis(4-methylphenyl)benzenamine] (97%, Sigma Aldrich), NPB - *N,N'*-Di-1-naphthyl-*N,N'*-diphenylbenzidine (TCI-Europe), TPBi - 2,2',2''-(1,3,5-Benzinetriyl)-tris(1-phenyl-1-*H*-benzimidazole) (Molekula), LiF (99.995%, Sigma Aldrich), Aluminium wire (99.9995%, Alfa Aesar). OLED devices were fabricated using pre-cleaned indium-tin-oxide (ITO) coated glass substrates with a sheet resistance of 20  $\Omega/\text{cm}^2$  and ITO thickness of 100 nm. The formed OLED devices had a pixel size of 4 mm by 2 mm. All organic and cathode layers were thermally evaporated using Kurt J. Lesker Spectros II deposition at  $10^{-6}$  mbar. All organic materials and aluminium were deposited at a rate of 1  $\text{\AA s}^{-1}$  and between 0.1 – 2  $\text{\AA s}^{-1}$  for coevaporated layers. The LiF layer was deposited at 0.2  $\text{\AA s}^{-1}$ . Characterization of OLED devices was conducted in the 10-inch integrating sphere (Labsphere) connected to a Source Measure Unit.



## S4 – References

- (1) P. Pander, A. Swist, P. Zassowski, J. Soloducho, M. Lapkowski, P. Data, *Electrochim. Acta* **2017**, 257, 192–202.
- (2) Z. Liu, M. F. Qayyum, C. Wu, M. T. Whited, P. I. Djurovich, K. O. Hodgson, B. Hedman, E. I. Solomon, M. E. Thompson, *J. Am. Chem. Soc.* **2011**, 133 (11), 3700-3703.
- (3) Williams, A. T. R.; Winfield, S. A.; Miller, J. N.: *Analyst* **1983**, 108, 1067.
- (4) J.C. de Mello, H.F. Wittmann, R.H. Friend, *Adv Mater*, **1997**, 9(3), 230.
- (5) S. Hamai, F. Hirayama, *J. Phys. Chem.*, **1983**, 87, 83.
